# Supplementary material for: Acetylation of ELF5 suppresses breast cancer progression by promoting its degradation and targeting CCND1
Source: PubMed Central journal article supplement (PMC7979705; doi:10.1038/s41698-021-00158-3), 2021-03-19
Supplement: 41698_2021_158_MOESM1_ESM.pdf [file 41698_2021_158_MOESM1_ESM.pdf]

1 **Supplementary information**

2

3 **Acetylation of ELF5 suppresses breast cancer**  
4 **progression by promoting its degradation and**  
5 **targeting *CCND1***

6

7 Xiahui Li<sup>1</sup>, Shujing Li<sup>1</sup>, Bowen Li<sup>1</sup>, Yanan Li<sup>1</sup>, Aman Sattout<sup>1</sup>, Kangkai Xia<sup>1</sup>, Yuxi  
8 Yang<sup>1</sup>, Bashir Ahmad<sup>1</sup>, Huijian Wu<sup>1\*</sup>

9

10 1. School of Bioengineering & Key Laboratory of Protein Modification and Disease, Liaoning  
11 Province, Dalian University of Technology, Dalian 116024, China.

12

13 \*Correspondence: wuhj@dlut.edu.cn

14

15

16

|       |                                                                                                                                                                  |     |
|-------|------------------------------------------------------------------------------------------------------------------------------------------------------------------|-----|
| Human | MLDSVTHSTFLPNTSFCDPLMSWTDLFSNEEYYPAFEHQTACDSYWTSVH                                                                                                               | 50  |
| Rat   | MLDSVTHSTFLPNTSFCDPLMSWTDLFSNEEYYPAFEHQTACDSYWTSVH                                                                                                               |     |
| Cow   | MLDSVTHSTFLPNTSFCDPLMSWTDLFSNEEYYPAFEHQTACDSYWTSVH                                                                                                               |     |
| Dog   | MLDSVTHSTFLPNTSFCDPLMSWTDLFSNEEYYPAFEHQTACDSYWTSVH                                                                                                               |     |
| Pan   | MPSPHSHRVM LDSVTHSTFLPNASFCDPLMSWTDLFSSEYYPAFEHQTACDSYWTSVH                                                                                                      |     |
| Human | PEYWT <sup>56</sup> KRHVWEWLQFCCDQY <sup>71</sup> KLDNCISFCNFNISGLQLCSMTQEEFVEAAGLCGEYLYF                                                                        | 110 |
| Rat   | PEYWT <sup>56</sup> KRHVWEWLQFCCDQY <sup>71</sup> KLDANCISFCHFNISGLQLCSMTQEEFIEAAGICGEYLYF                                                                       |     |
| Cow   | PEYWT <sup>56</sup> KRHVWEWLQFCCDQY <sup>71</sup> KLDANCISFCHFNISGLQLCGMTQEEFMEEAAGVCGEYLYF                                                                      |     |
| Dog   | PEYWT <sup>56</sup> KRHVWEWLQFCCDQY <sup>71</sup> KLDANCISFCHFNVSGQLCSMTQEEFVEAAGICGEYLYF                                                                        |     |
| Pan   | PEYWT <sup>56</sup> KRHVWEWLQFCCDQY <sup>71</sup> KLDNCISFCHFNISGLQLCSMTQEEFVEAAGLCGEYLYF                                                                        |     |
| Human | ILQNIRTQGYSFNDAAEES <sup>130</sup> K <sup>134</sup> ATIK <sup>143</sup> ADSNCL <sup>148</sup> K <sup>148</sup> TSGIKSQDCHSHSRTSLQSSHLWEFVR                       | 170 |
| Rat   | ILQNIRSQGYSFNDAAEET <sup>130</sup> K <sup>134</sup> TG <sup>134</sup> IK <sup>143</sup> DYADSSCL <sup>148</sup> K <sup>148</sup> TSGIKSQDCH- -SRTSLQSSHLWEFVR    |     |
| Cow   | ILQSIRSQGYSFNDPDET <sup>130</sup> K <sup>134</sup> ATIK <sup>143</sup> DYADSSCL <sup>148</sup> K <sup>148</sup> TSGIKSQDCHSHSRTSLQSSHLWEFVR                      |     |
| Dog   | ILQNIRSQGYSFNDTEET <sup>130</sup> K <sup>134</sup> AAIK <sup>143</sup> DYADSNCL <sup>148</sup> K <sup>148</sup> TSGIKSQDCHSQSRTSLQSSHLWEFVR                      |     |
| Pan   | ILQNIRTQGYSFNDAAEES <sup>130</sup> K <sup>134</sup> ATIK <sup>143</sup> DYADSNCL <sup>148</sup> K <sup>148</sup> TSGIKSQDCHSHSRTSLQSSHLWEFVR                     |     |
| Human | DLLSPEENCGILEWEDREQGIFRVV <sup>197</sup> K <sup>203</sup> SEALAK <sup>209/210</sup> MWGWQR <sup>218</sup> K <sup>218</sup> KNDRM <sup>228</sup> TYEKLSRALRYYYKTG | 230 |
| Rat   | DLLSPEENCGILEWEDREQGIFRVV <sup>197</sup> K <sup>203</sup> SEALAK <sup>209/210</sup> MWGWQR <sup>218</sup> K <sup>218</sup> KNDRM <sup>228</sup> TYEKLSRALRYYYKTG |     |
| Cow   | DLLSPEENCGILEWEDREQGIFRVV <sup>197</sup> K <sup>203</sup> SEALAK <sup>209/210</sup> MWGWQR <sup>218</sup> K <sup>218</sup> KNDRM <sup>228</sup> TYEKLSRALRYYYKTG |     |
| Dog   | DLLSPEENCGILEWEDREQGIFRVV <sup>197</sup> K <sup>203</sup> SEALAK <sup>209/210</sup> MWGWQR <sup>218</sup> K <sup>218</sup> KNDRM <sup>228</sup> TYEKLSRALRYYYKTG |     |
| Pan   | DLLSPEENCGILEWEDREQGIFRVV <sup>197</sup> K <sup>203</sup> SEALAK <sup>209/210</sup> MWGWQR <sup>218</sup> K <sup>218</sup> KNDRM <sup>228</sup> TYEKLSRALRYYYKTG |     |
| Human | ILERVDRRLVY <sup>242</sup> K <sup>245</sup> FGK <sup>254</sup> NAHWQEDK <sup>255</sup> L                                                                         |     |
| Rat   | ILERVDRRLVY <sup>242</sup> K <sup>245</sup> FGK <sup>254</sup> NAHWQEDK <sup>255</sup> L                                                                         |     |
| Cow   | ILERVDRRLVY <sup>242</sup> K <sup>245</sup> FGK <sup>254</sup> NAHWQEDK <sup>255</sup> L                                                                         |     |
| Dog   | ILERVDRRLVY <sup>242</sup> K <sup>245</sup> FGK <sup>254</sup> NAHWQEDK <sup>255</sup> L                                                                         |     |
| Pan   | ILERVDRRLVY <sup>242</sup> K <sup>245</sup> FGK <sup>254</sup> NAHWQEDK <sup>255</sup> L                                                                         |     |

1

2 Supplementary Figure 1. Alignment of ELF5 sequences from different species.  
 3 Alignment of five different ELF5 vertebrate orthologs with the conserved lysine  
 4 residues numbered and colored in red.

5

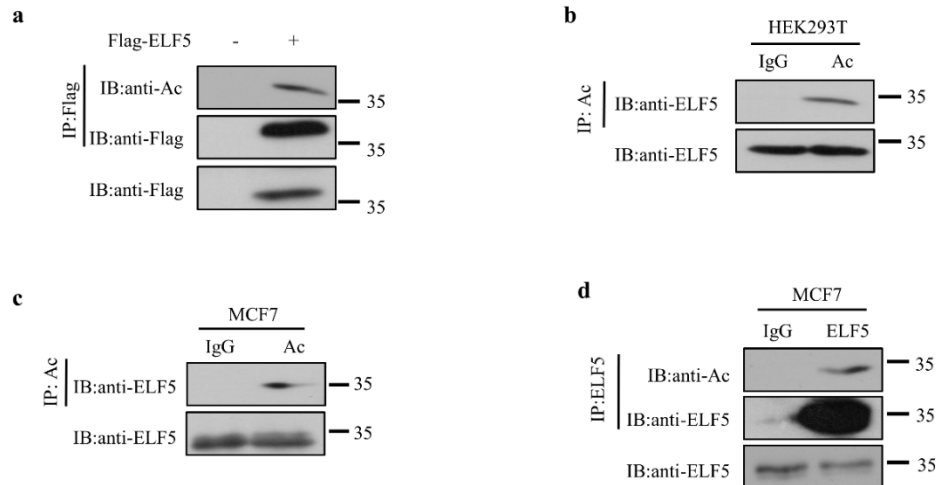

6

7 Supplementary Figure 2. Acetylation of ELF5 in HEK293T and MCF7 cells.  
 8 (a) Acetylation of exogenous ELF5. HEK293T cells were transfected with Flag-ELF5,  
 9 immunoprecipitated with anti-Flag affinity gel and immunoblotted with anti-Ac Ab. (b)  
 10 Acetylation of endogenous ELF5 in HEK293T cells. Cell lysis was subjected to  
 11 immunoprecipitation with anti-AcK Ab or normal IgG, followed by western blot with  
 12 anti-ELF5 Ab. (c-d) Acetylation of endogenous ELF5 in MCF7 cells. Cell lysis was  
 13 subjected to immunoprecipitation with anti-AcK Ab or normal IgG, followed by  
 14 western blot with anti-ELF5 Ab (c). Cell lysis was subjected to immunoprecipitation  
 15 with anti-ELF5 Ab or normal IgG, followed by western blot with anti-AcK Ab (d).

1

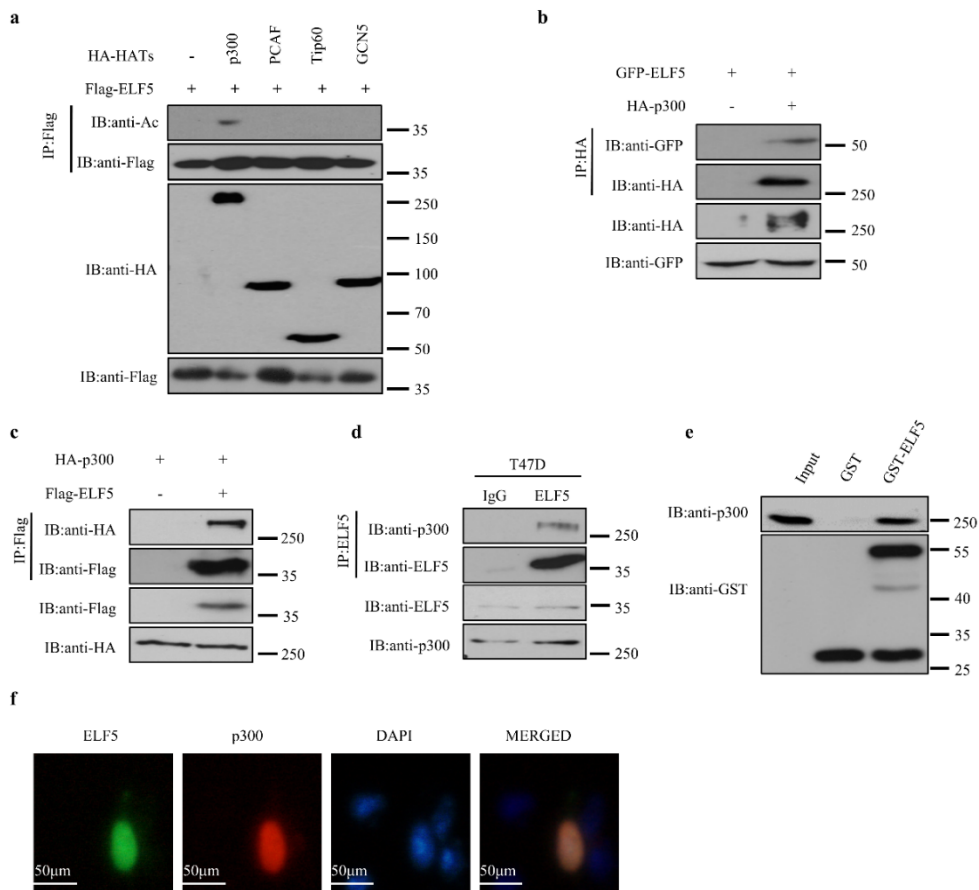

2

3 Supplementary Figure 3. ELF5 interacts with p300 both *in vitro* and *in vivo*.

4 (a) p300-mediated acetylation of exogenous ELF5. HeLa cells were co-transfected with  
 5 Flag-ELF5 and different HA-tagged HATs, HA-p300, HA-PCAF, HA-GCN5, or HA-  
 6 Tip60, and the cell lysates were immunoprecipitated with anti-Flag affinity gel and  
 7 immunoblotted with the anti-AcK Ab. (b) Exogenous ELF5 interacted with p300 *in vivo*.  
 8 HEK293T cells expressing HA-p300 only or HA-p300 and GFP-ELF5 were  
 9 prepared and subjected to affinity purification with anti-HA Ab, followed by Western  
 10 blot with the indicated antibodies. (c) Exogenous ELF5 interacted with p300 *in vivo*.  
 11 HEK293T cells transfected with Flag-ELF5 only, or with Flag-ELF5 and HA-p300  
 12 were subjected to co-immunoprecipitation with anti-Flag affinity gel followed by  
 13 immunoblotting with antibodies as indicated. (d) Endogenous ELF5 interacted with  
 14 p300 *in vivo*. T47D cells were subjected to immunoprecipitation with anti-ELF5  
 15 antibody or normal IgG followed by Western blot with the indicated antibodies. (e)  
 16 ELF5 interacted with p300 *in vitro*. GST pull-down assays showing the interaction  
 17 between GST-fusion ELF5 and endogenous p300 in T47D cells. (f) ELF5 and p300  
 18 were colocalized in the nucleus. Immunofluorescence showing the localization of ELF5  
 19 (blue) and p300(red) in the nucleus (blue) of T47D cells.

20

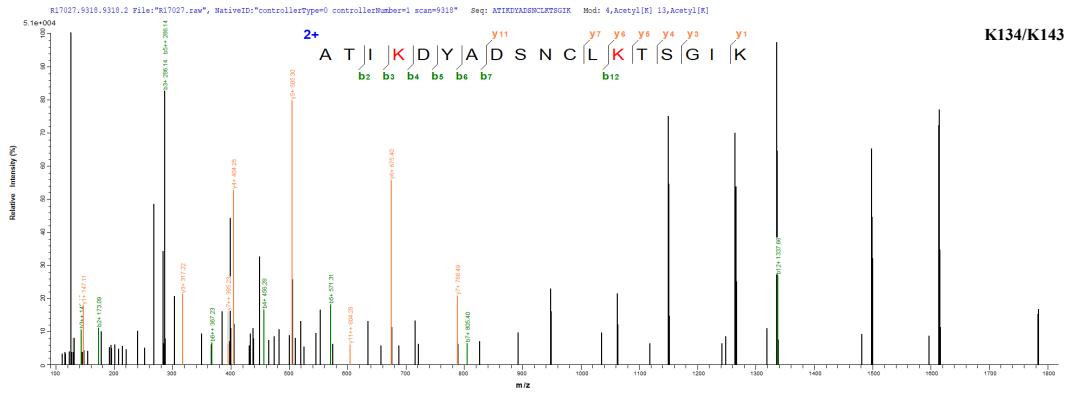

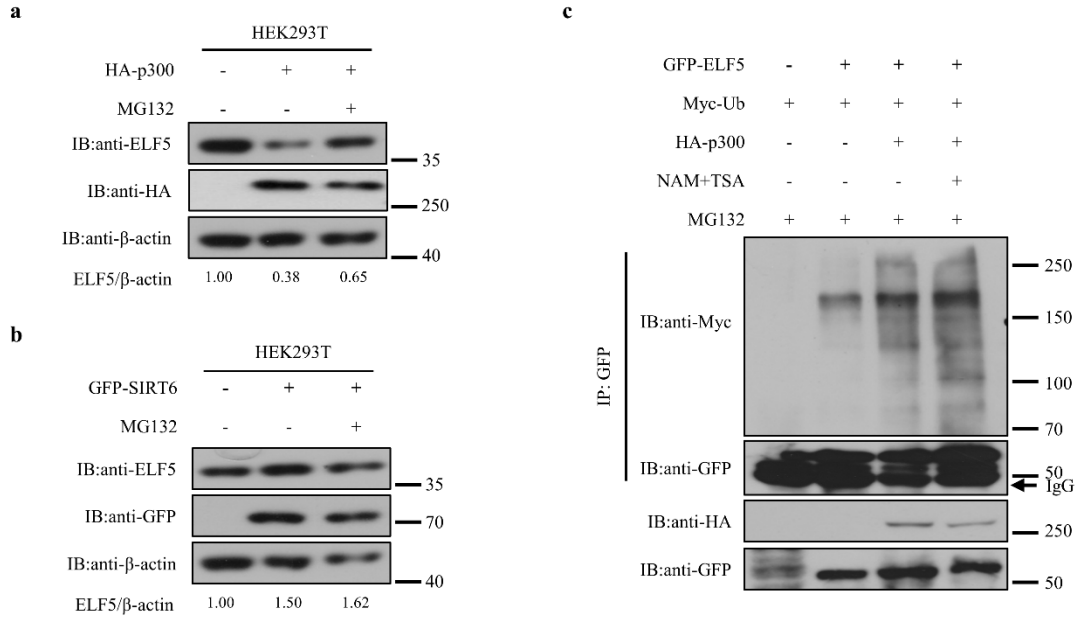

1

2 Supplementary Figure 5. Acetylation promotes the ubiquitin-proteasome degradation  
3 of ELF5.

4 (a) The protein level of ELF5 influenced by p300. HEK293T cells overexpressing HA-  
5 p300 in the absence or presence of 20  $\mu$ M MG132 were prepared and subjected to  
6 western blot with the indicated antibodies. (b) The protein level of ELF5 influenced by  
7 SIRT6. HEK293T cells overexpressing GFP-SIRT6 in the absence or presence of 20  
8  $\mu$ M MG132 were prepared and subjected to western blot with the indicated antibodies.

9 (c) The ubiquitination level of ELF5 influenced by p300. Ubiquitination levels of GFP-  
10 ELF5 in HEK293T cells without or with overexpression with HA-p300. The cells were  
11 treated without or with NAM plus TSA before being harvested.

12

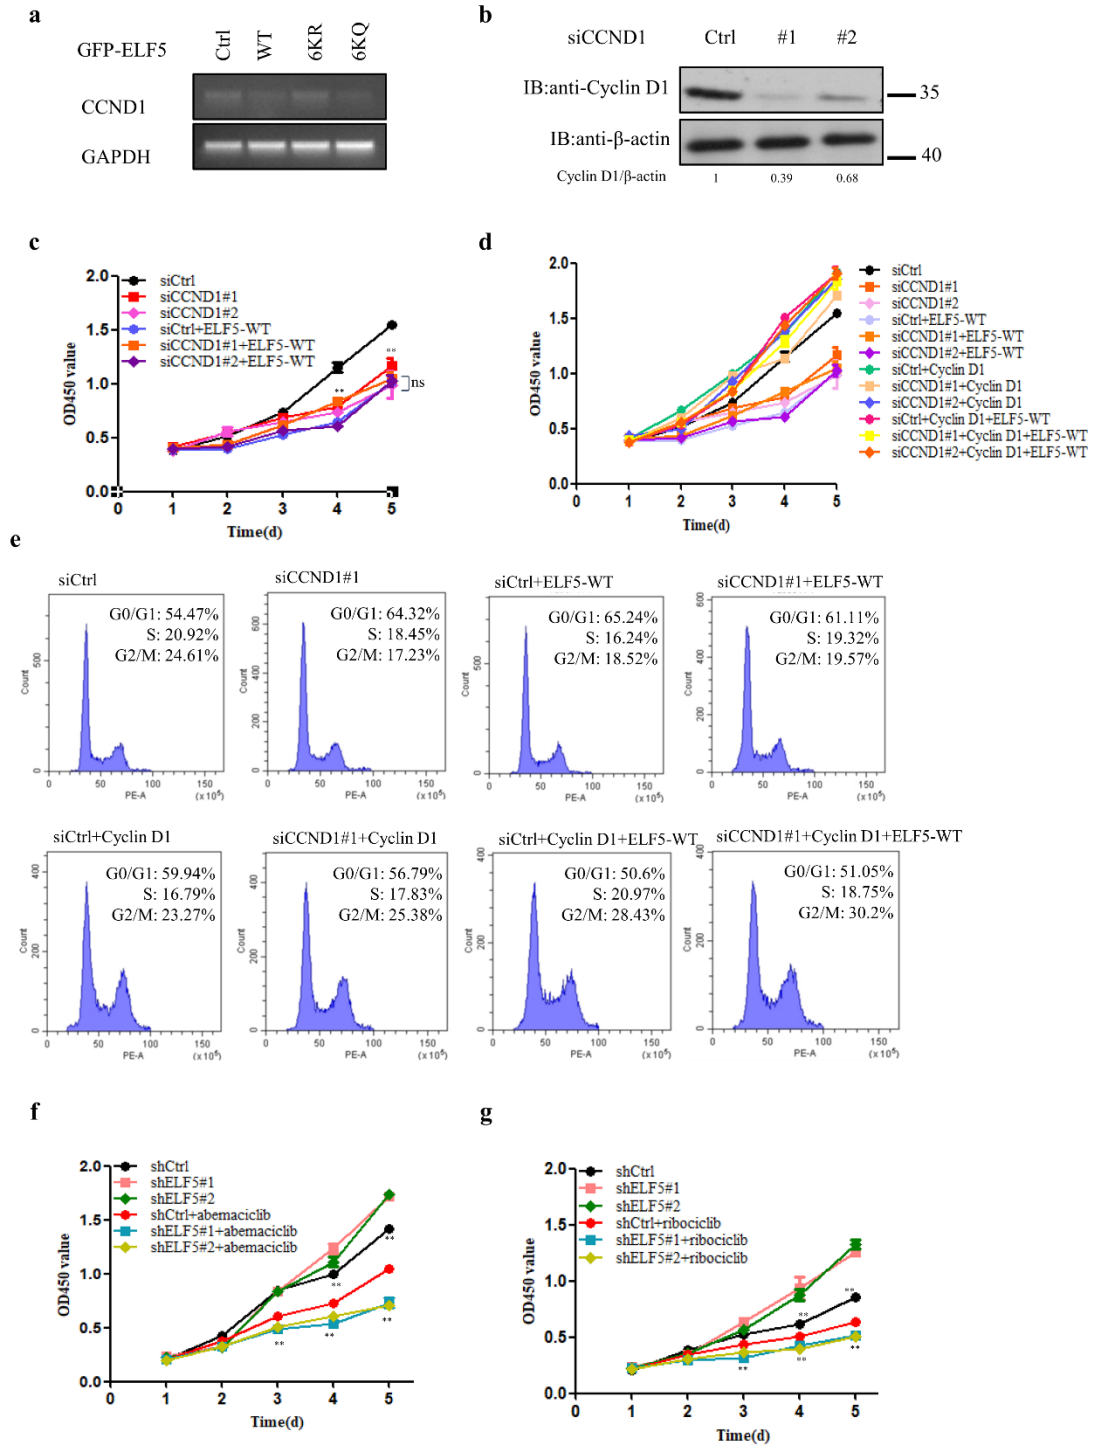

1

2 Supplementary Figure 6. ELF5 inhibit cell proliferation through CCND1.

3 (a) Cells that overexpressed with GFP-ELF5 WT, GFP-ELF5 6KR, GFP-ELF5-6KQ or  
 4 the control vector were analyzed for CCND1 mRNA levels. (b) Western-blot detection  
 5 of Cyclin D1 expression in MCF7 cells expressing a siCtrl or siCCND1. (c) Growth  
 6 curves of MCF7 cells that stably overexpressed with GFP-ELF5 without or with  
 7 siCCND1 as measured by CCK8 assay. Data are the means  $\pm$  SDs from three  
 8 determinations. \* $p$ <0.05; \*\* $p$ <0.01. (d) Growth curves of MCF7 cells performed a  
 9 CCND1 rescue experiment overexpressing ELF5 wildtype. Data are the means  $\pm$  SDs  
 10 from three determinations. \* $p$ <0.05; \*\* $p$ <0.01. (e) Flow cytometry analysis of the cell

1 cycle showing the distribution of MCF7 cells stably transfected with ELF5 WT with a  
2 Cyclin D1 rescue. (f-g) Growth curves of T47D cells expressing a shCtrl or shELF5  
3 without or with abemaciclib (e) or ribociclib (f) treatment as measured by CCK8 assay.  
4 \*p<0.05; \*\*p<0.01; ns, no significance.  
5

1

2

Supplementary Table 1. List of identified p300-interacting proteins

|         |        |          |          |        |        |        |        |
|---------|--------|----------|----------|--------|--------|--------|--------|
| AAMP    | ABCE1  | ABCF1    | ABCF2    | ABCF3  | ACACA  | ACAD9  | ACLY   |
| ACSL3   | ACTB   | ADAR     | ADRM1    | AGK    | AGPS   | AICDA  | AIFM1  |
| AIMP1   | AIMP2  | AKAP8    | ALDH18A1 | ALDOA  | ALYREF | AMOT   | AP1B1  |
| AP1G1   | AP1M1  | AP2A1    | AP2A2    | AP2B1  | AP2M1  | AP3B1  | ARCNI  |
| ARF5    | ARMC6  | ASIC1    | ASNS     | ATG3   | AUP1   | BAG6   | BAZ1B  |
| BCCIP   | BSN    | BTAF1    | BUB3     | BUD23  | BZW1   | BZW2   | C1QBP  |
| C2CD5   | CALR   | CALU     | CAND1    | CASC3  | CBL    | CCAR2  | CCDC6  |
| CCDC9   | CCT6A  | CDC16    | CDC27    | CDC40  | CDC5L  | CDC73  | CDK1   |
| CDK12   | CDK9   | CENPU    | CFDP1    | CHD3   | CDERP  | CDMP6  | CHTF18 |
| CHTOP   | CKAP4  | CLINT1   | CLNS1A   | CLPB   | CLPX   | CLU    | CMC1   |
| CMC2    | CMTR1  | CNN3     | COPA     | COPB1  | COPB2  | COPE   | COPG1  |
| COPS4   | COPS5  | COPS6    | CPSF1    | CPSF3  | CPSF6  | CPSF7  | CSDE1  |
| CSE1L   | CSN2   | CSTF3    | CTR9     | CTU2   | CUL1   | CUL3   | CUL4B  |
| CWF19L1 | DAXX   | DBR1     | DCD      | DCTN2  | DDB1   | DDOST  | DDX1   |
| DDX17   | DDX18  | DDX21    | DDX23    | DDX27  | DDX3X  | DDX41  | DDX42  |
| DDX46   | DDX47  | DDX5     | DDX50    | DDX54  | DDX55  | DDX56  | DDX6   |
| DHCR7   | DHX15  | DHX16    | DHX30    | DHX36  | DHX38  | DHX57  | DHX9   |
| DIS3    | DKC1   | DNM2     | DNMT1    | DNPEP  | DOCK7  | DPM1   | DRG1   |
| DRG2    | DUS3L  | EBNA1BP2 | ECPAS    | EDC3   | EEA1   | EEF1B2 | EEF1D  |
| EEF1G   | EEF2   | EHD4     | EIF2A    | EIF3A  | EIF3B  | EIF3C  | EIF3D  |
| EIF3E   | EIF3F  | EIF3G    | EIF3H    | EIF3I  | EIF3J  | EIF3L  | EIF3M  |
| ELAVL1  | ELF5   | ELP1     | ELP2     | ELP3   | EMC1   | EMD    | ENAH   |
| ERI1    | ESYT2  | EWSR1    | EXOC3    | FAF1   | FAF2   | FAS    | FBLL1  |
| FHL1    | FIP1L1 | FKBP8    | FLII     | FLNA   | FOXK1  | FOXK2  | FRAS1  |
| FRG1    | FUBP3  | FUS      | FXR1     | FYCO1  | FZD6   | G3BP1  | GNL1   |
| G3BP2   | GANAB  | GCFC2    | GCN1     | GFPT1  | GFPT2  | GNE    | GTPBP4 |
| GNL3    | GPHN   | GPS1     | GRN      | GRSF1  | GRWD1  | GTF2I  | HDGF   |
| GYS1    | HACD3  | HADHA    | HADHB    | HAT1   | HBS1L  | HDAC1  | HLA-A  |
| HDHD5   | HELLS  | HES6     | HGH1     | HIC2   | HK1    | HK2    | HNRNPM |
| HMGB1   | HMMR   | HNRNPC   | HNRNPD   | HNRNPF | HNRNPK | HNRNPL | IFIT1  |
| HNRNPR  | HNRNPU | HSPA5    | HSPA9    | IDH3A  | IDH3B  | IDH3G  | IPO5   |
| IFRD1   | IGBP1  | IGHG1    | IK       | ILF2   | ILF3   | IPO4   | KIF5B  |
| IPO7    | IPO9   | ITGAL    | IWS1     | KHSRP  | KIF11  | KIF2A  | KRR1   |
| KIFC1   | KLC1   | KLC2     | KLF16    | KLF4   | KPNB1  | KRI1   | LDHB   |
| LAMP2   | LARP1  | LARP4    | LARP7    | LASP1  | LCK    | LDHA   | MAP4   |
| LEO1    | LETM1  | LGR6     | LSG1     | LUC7L  | LYAR   | MAGT1  | MCM3   |
| MAP7    | MASP2  | MATR3    | MAZ      | MCAT   | MCCC2  | MCM2   | MFAP1  |
| MCM4    | MCM5   | MCM6     | MCM7     | MCMBP  | MEMO1  | MEPCE  | MPP6   |
| MFN1    | MIER1  | MLST8    | MMS19    | MOGS   | MORN1  | MOV10  | MYH10  |
| MRM3    | MRTO4  | MSH2     | MSH6     | MTA2   | MTDH   | MTREX  | NCBP1  |
| MYH9    | NAA15  | NACA     | NADK     | NAMPT  | NASP   | NAT10  | NMD3   |
| NCBP3   | NCLN   | NEK9     | NELFE    | NEMF   | NFS1   | NKRF   | NOP58  |



|         |         |        |        |         |          |         |         |
|---------|---------|--------|--------|---------|----------|---------|---------|
| NMT2    | NOB1    | NONO   | NOP14  | NOP2    | NOP53    | NOP56   | NUB1    |
| NOP9    | NOSIP   | NPM1   | NR1H3  | NRDC    | NSDHL    | NSF     | OSBP    |
| NUCKS1  | NUMA1   | NUO93  | OGDHL  | OLA1    | OPA1     | OPA6    | PALLD   |
| OTUB1   | OXSR1   | PA2G4  | PABPC1 | PABPC4  | PABPN1   | PAF1    | PCNA    |
| PANK4   | PARG    | PARP1  | PATL1  | PCAT1   | PCBP1    | PCBP2   | PELO    |
| PDCD2   | PDCD4   | PDE12  | PDIA3  | PDIA4   | PDIA5    | PDIA6   | PHF6    |
| PELP1   | PGAM1   | PGAM5  | PHAX   | PHB     | PHB2     | PHF23   | PNO1    |
| PHGDH   | PINX1   | PITX2  | PKN2   | PLCG1   | PLOD1    | PLRG1   | POP1    |
| PNPT1   | POLDIP3 | POLR1C | POLR2A | POLR2A  | POLR2L   | POLR3C  | PREB    |
| PPAN    | PPIL2   | PPIL4  | PPM1G  | PPP1R3A | PRCC     | PRDX4   | PRPF8   |
| PRKDC   | PRMT1   | PRPF19 | PRPF3  | PRPF31  | PRPF4B   | PRPF6   | PSMD7   |
| PRPS1   | PSD2    | PSIP1  | PSMD1  | PSMD2   | PSMD3    | PSMD6   | PUM1    |
| PSMD8   | PSME3   | PSPC1  | PTBP1  | PTBP2   | PTCD3    | PUF60   | RACK1   |
| PURA    | PURB    | PUS7   | PWP1   | PYCR2   | PYM1     | RABL6   | RBM17   |
| RALY    | RAN     | RBBP4  | RBBP5  | RBBP6   | RBM14    | RBM15   | RBM7    |
| RBM23   | RBM25   | RBM26  | RBM27  | RBM28   | RBM39    | RBM4    | RFC2    |
| RBMX    | RBP2    | RCC1   | RCC2   | RCN1    | RCN2     | RDH11   | ROBO4   |
| RFC3    | RFC4    | RGS11  | RIC8A  | RIF1    | RIOK1    | RNF40   | RPN1    |
| ROCK1   | ROCK2   | RPAP2  | RPAP3  | RPF1    | RPF2     | RPL14   | RTN4    |
| RPN2    | RRM1    | RSBN1  | RSF1   | RTCB    | RTF1     | RTF2    | SBNO1   |
| RTRAF   | RWDD1   | SACMIL | SAFB   | SAFB2   | SAFB3    | SART3   | SEPTIN2 |
| SCAF4   | SCNM1   | SCO2   | SCRIB  | SCYL1   | SEC62    | SEC63   | SF3B2   |
| SEPTIN7 | SESN2   | SET    | SF3A1  | SF3A2   | SF3A3    | SF3B1   | SLC3A2  |
| SF3B3   | SFPQ    | SFXN1  | SLBP   | SLC1A5  | SLC25A10 | SLC25A6 | SND1    |
| SLC7A5  | SLK     | SLTM   | SMC1A  | SMC2    | SMC3     | SMC4    | SRP68   |
| SNRPA   | SNW1    | SNX1   | SNX9   | SP3     | SPAG5    | SPART   | SRSF4   |
| SRP72   | SRPK1   | SRPK2  | SRRM2  | SRRT    | SRSF1    | SRSF2   | STAU1   |
| SRSF5   | SRSF6   | SRSF7  | SRSF9  | SSB     | SSRP1    | STAT3   | SUDS3   |
| STK26   | STK39   | STON2  | STRAP  | STRBP   | STT3A    | STT3B   | SYNM    |
| SUPT4H1 | SUPT5H  | SUPT6H | SURF2  | SURF6   | SYK      | SYNC    | SHOC2   |
| TAF15   | TAF6    | TBL2   | TCEA1  | TECR    | TENT4A   | TES     | TNPO1   |
| TFB1M   | TFPC    | TIMM44 | TIMM50 | TLN1    | TMC5     | TMEM201 | TRIM28  |
| TNPO3   | TOE1    | TPM4   | TPX2   | TRA2A   | TRA2B    | TRIM21  | TXLNA   |
| TRMT1   | TRMT1L  | TSR1   | TSR3   | TTC4    | TTL9     | TUFM    | TFAP2C  |
| TXLNG   | TXNL4A  | TYW5   | U2AF1  | U2AF2   | U2SURP   | UBA5    | USP9X   |
| UBE3C   | UFD1    | UFL1   | UMPS   | UPF1    | UQCRC2   | USO1    | UBE2S   |
| UTP18   | UTS2    | VAC14  | VCP    | VPS35   | VPS4A    | VPS72   | XAB2    |
| WBP4    | WDHD1   | WDR11  | WDR44  | WDR82   | WEE1     | WRAP53  | WBP11   |
| XPO1    | XPO5    | XPOT   | XRCC5  | XRCC6   | XRN2     | YJU2    | YLPM1   |
| ZC3H4   | ZC3HC1  | ZFP91  | ZFR    | ZNF24   | ZNF469   | ZNF48   | ZYX     |
| ZW10    |         |        |        |         |          |         |         |

1  
2  
3

1 Supplementary Table 2. The primers for Site-directed mutagenesis

|                | sense (5'-3')                        | antisense (5'-3')                  |
|----------------|--------------------------------------|------------------------------------|
| K130R          | gacgctgaagaaagcagggccaccatcaaga      | tctttgatggtggcctgctttctcagcgtc     |
| K134R          | gcaaggccaccatcagagactatgctgattcc     | ggaatcagcatagctctgatggtggccttgc    |
| K143R          | gattccaactgcttgagaacaagtgcatcaaaa    | ttttgatgccactgttctcaagcagttggaatc  |
| K197R          | aatfttcgggtggttagatcggagccctg        | cagggcttccgatctaaccaccgaaaaatt     |
| K228R          | cctgagatactactatagaacaggaatttggagc   | gctccaaaattcctgttctatagtagtactcagg |
| K245R          | tagtgtaacaatttgaagaaatgcacacgggtg    | caccctgtgcatttctccaaattgtactacta   |
| K130Q          | gacgctgaagaaagccagggccaccatcaag      | ctttgatggtggcctggctttctcagcgtc     |
| K134Q          | gcaaggccaccatccaagactatgctgattcc     | ggaatcagcatagcttggatggtggccttgc    |
| K143Q          | tgattccaactgcttgcaacaagtgcatcaaaa    | tttgatgccactgtttgcaagcagttggaatca  |
| K197Q          | gaatfttcgggtggtcaatcggagccctgg       | ccagggcttccgattgaaccaccgaaaaattc   |
| K228Q          | ccctgagatactactatcaaacaggaatttggag   | ctccaaaattcctgtttgatagtagtactcagg  |
| K245Q          | ttagtgtacaatttggacaaaatgcacacgggtg   | caccctgtgcatttgtccaaattgtactactaa  |
| S1396R         | agaggagagtatacatacgttacctcgatagtgttc | gaacctatcgaggtaacgtatgtatactctctct |
| Y1397R         | ggagagtatacatatctcgcctcgatagtgttcat  | atgaacctatcgaggcgagatgtatactctcc   |
| D1399Y         | gtatacatatcttacctctatagttcatttcttcc  | ggaagaaatgaacctatagaggtaaatgtatac  |
| H133Y          | aaactggcagagctctacgggaacatgtttgt     | acaacatgtcccgtagagctctgccagttt     |
| Position 1-mut | aaggacaagatgaaggccatgctggccaccatc    | gatggtggccagcatggccttcatcttgcctt   |
| Position 2-mut | tcgtggcgcttcttggccatgcgccattctgc     | gcagaatgggcgatggccaagaacgccacga    |

2

3 Supplementary Table 3. The siRNA sequence for RNA interference

|                  | sense (5'-3')         | antisense (5'-3')     |
|------------------|-----------------------|-----------------------|
| siEP300#1        | ugacacaggcaggcuugactt | gucaagccugccugugucatt |
| siEP300#2        | cagagcaguccuggauuagtt | cuaauccaggacugcucuguu |
| siSIRT6#1        | gaaugugccaaguguaagatt | ucuuacacuuggcacauuuu  |
| siSIRT6#2        | gcuacguugacgaggucattt | augaccucguaacguagctt  |
| siCCND1#1        | ggagaacaacagaucauctt  | gaugaucuguuuguucuctc  |
| siCCND1#2        | gcacgauuucauugaacactt | gucaagccuhccugugucatt |
| Negative control | uucuccgaacgugucagutt  | acgugacacguucggagaatt |

4

5 Supplementary Table 4. The primers for ChIP analysis

|          | sense (5'-3')       | antisense (5'-3')   |
|----------|---------------------|---------------------|
| region 1 | gaacacctatcgattttgc | gaccagtccgtccttgcg  |
| region 2 | aaggtaggaaggcagcccc | ccatatccaagccggcaga |
| region 3 | ggtgtcgcgcgccccag   | ggaggctccaggactttgc |

6

7

8

9

10

11

12

13



Figure 4a

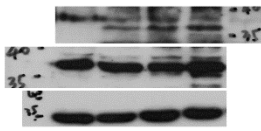

Figure 4b

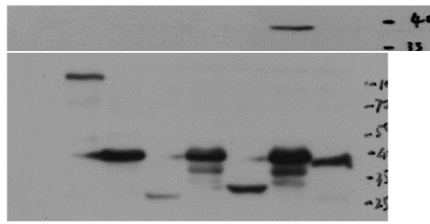

Figure 4c

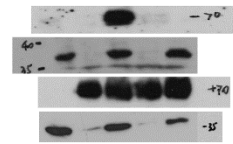

Figure 4d

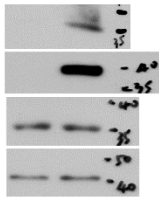

Figure 4e

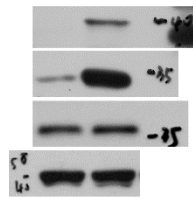

Figure 4f

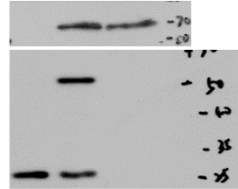

Figure 4g

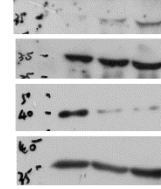

Figure 4h

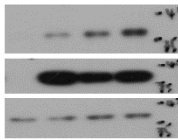

Figure 4i

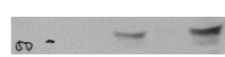

Figure 5a

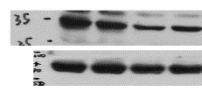

Figure 5b

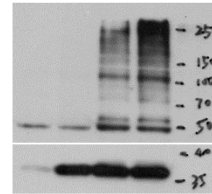

Figure 5c

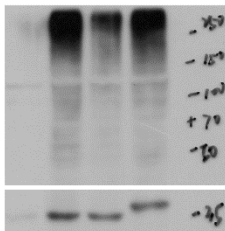

Figure 5d

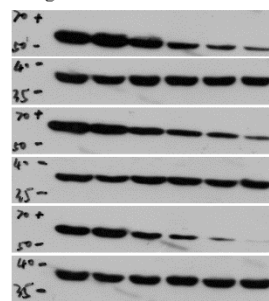

Figure 7b

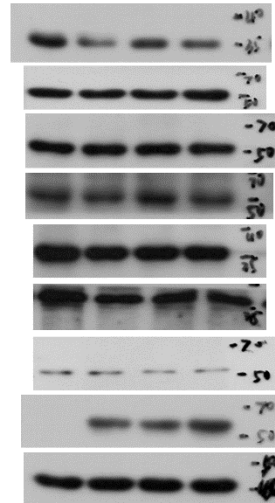

Figure 7g

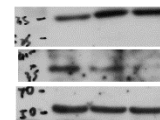

1

2

Supplementary Figure 2a

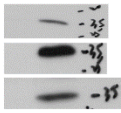

Supplementary Figure 2b

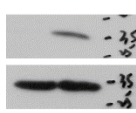

Supplementary Figure 2c

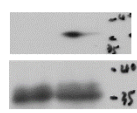

Supplementary Figure 2d

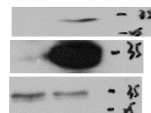

Supplementary Figure 3a

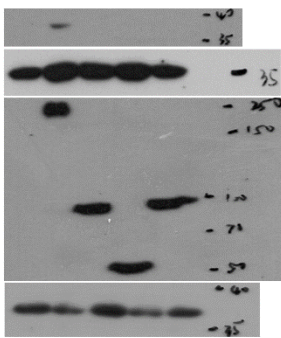

Supplementary Figure 3b

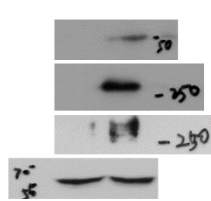

Supplementary Figure 3c

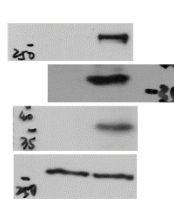

Supplementary Figure 3d

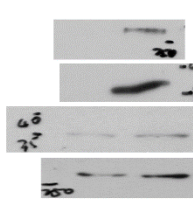

Supplementary Figure 5c

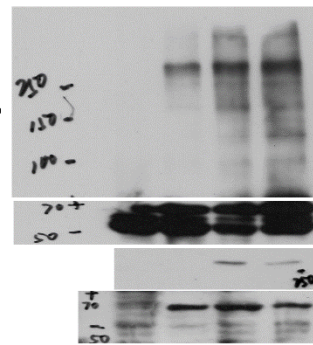

Supplementary Figure 3e

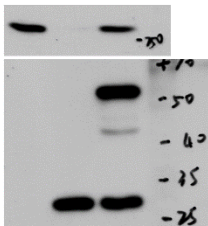

Supplementary Figure 5a

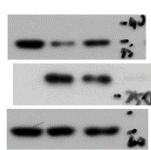

Supplementary Figure 5b

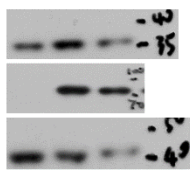

Supplementary Figure 6b

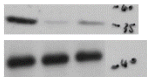

1  
2

1 Figure 1b

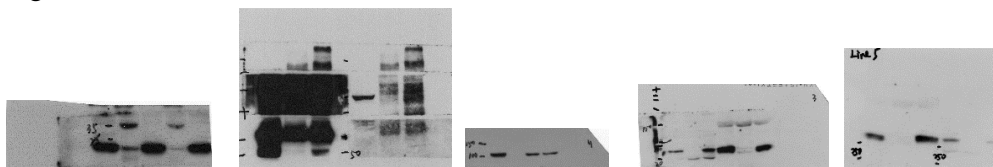

2

3

4 Figure 2a

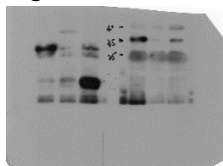

5

6 Figure 2b

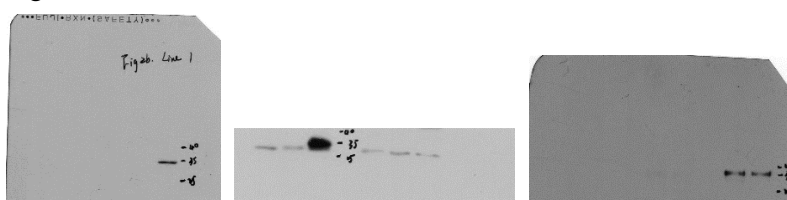

7

8

9 Figure 2c

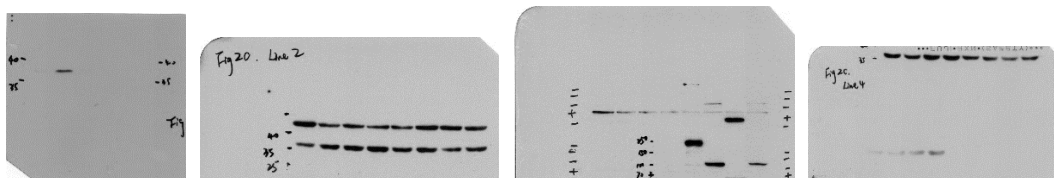

10

11 Figure 2d

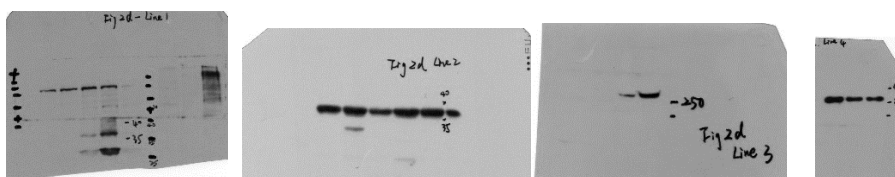

12

13

14 Figure 2f

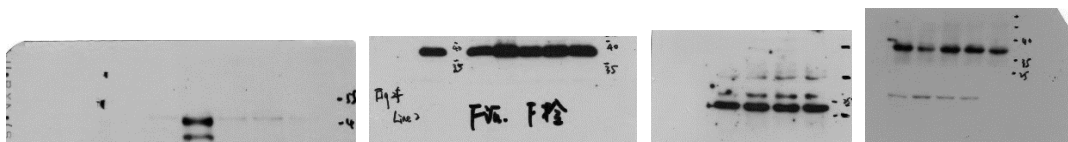

15

16 Figure 2g

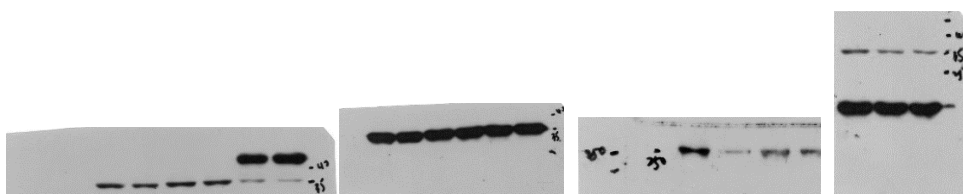

17

18

1 Figure 2h

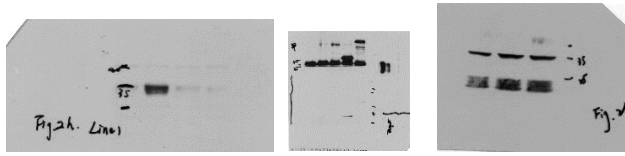

2

3 Figure 2i

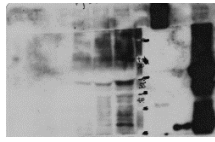

4

5 Figure 3e

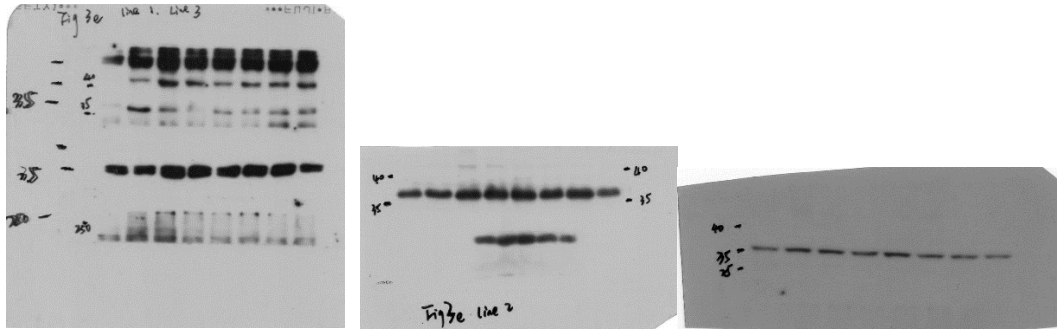

6

7 Figure 3g

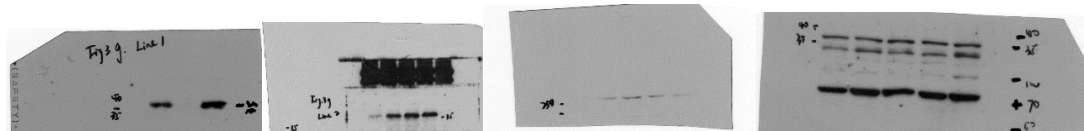

8

9 Figure 4a

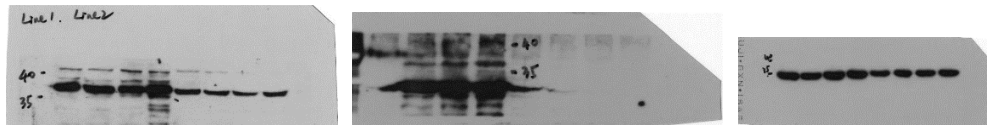

10

11 Figure 4b

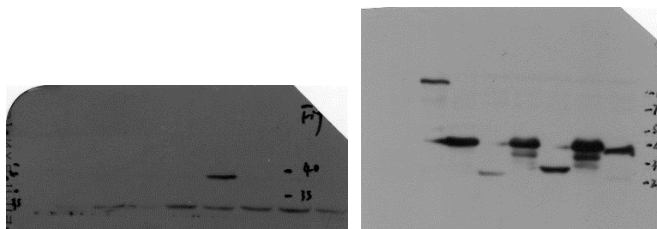

12

13 Figure 4c

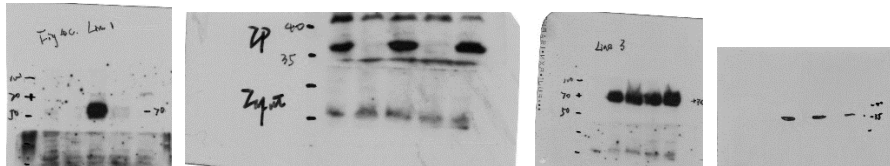

14

15

1 Figure 4d

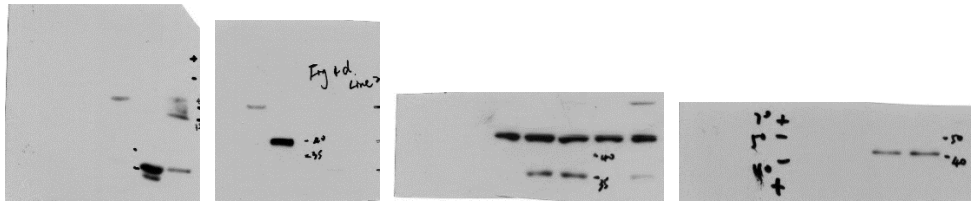

2  
3 Figure 4e

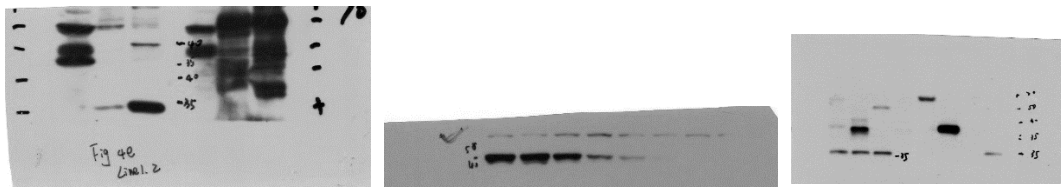

4  
5 Figure 4f

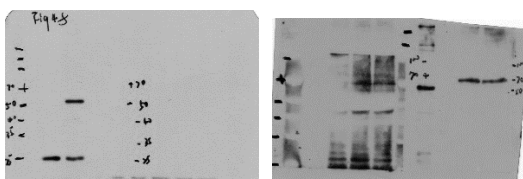

6  
7 Figure 4g

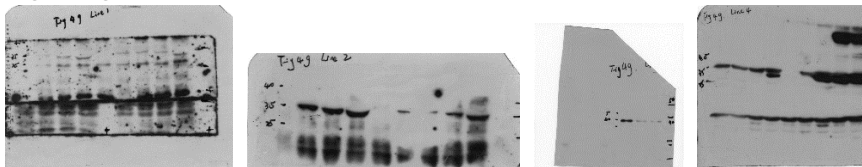

8  
9 Figure 4h

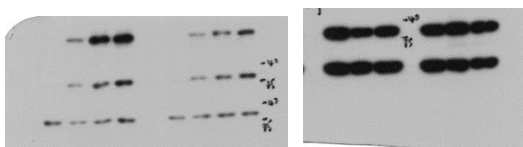

10  
11 Figure 4i

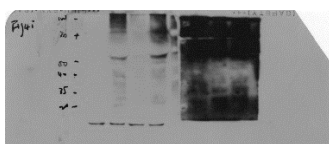

12  
13 Figure 5a

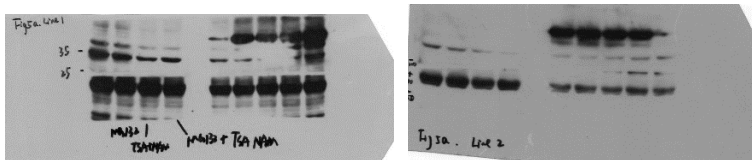

14  
15 Figure 5b

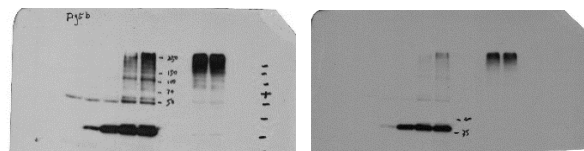

16

17



1 Figure 5c

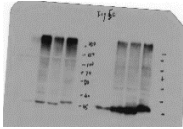

2  
3 Figure 5d

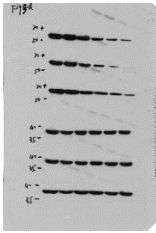

4  
5 Figure 7b

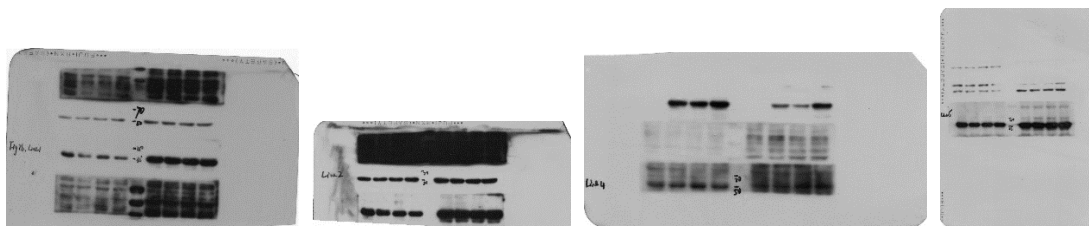

6

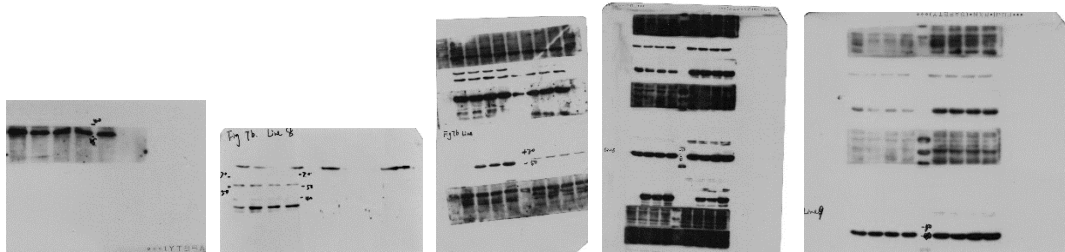

7

8 Figure 7g

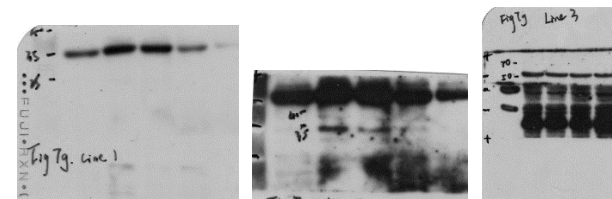

9

10 Supplementary Figure 2a

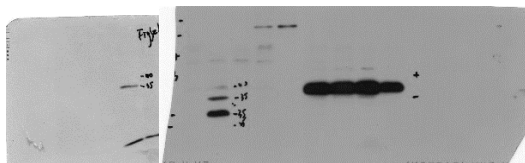

11

12 Supplementary Figure 2b

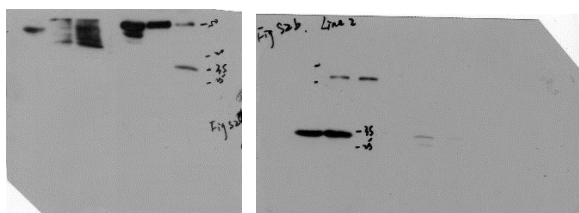

13

14

1 Supplementary Figure 2c

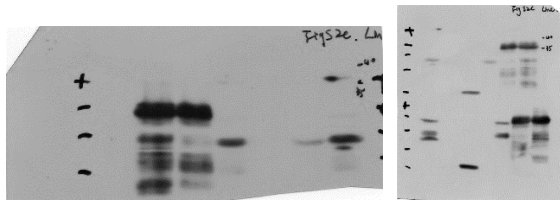

2

3 Supplementary Figure 2d

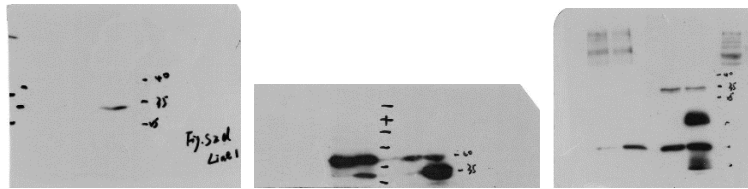

4

5 Supplementary Figure 3a

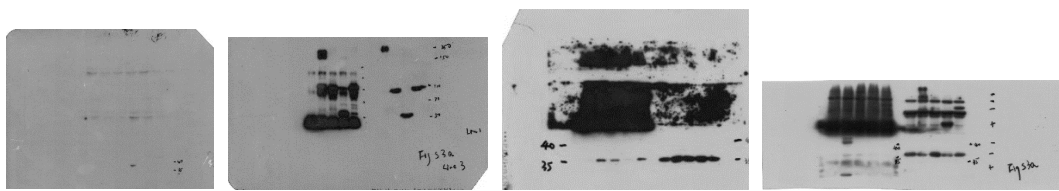

6

7 Supplementary Figure 3b

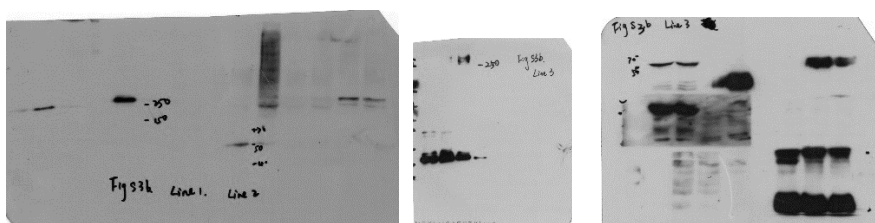

8

9 Supplementary Figure 3c

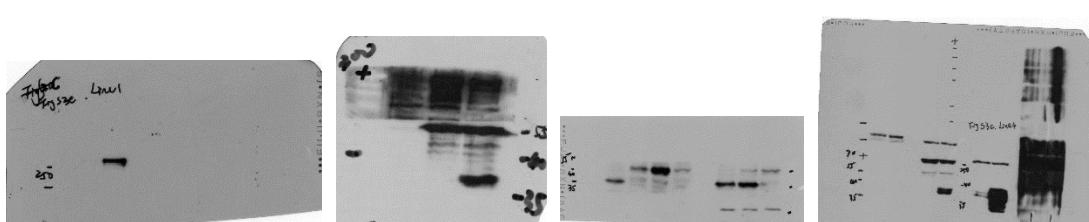

10

11

1 Supplementary Figure 3d

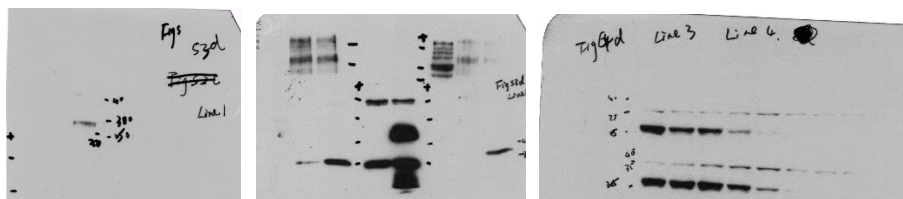

2

3 Supplementary Figure 3e

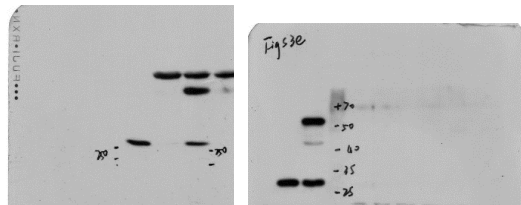

4

5 Supplementary Figure 5a

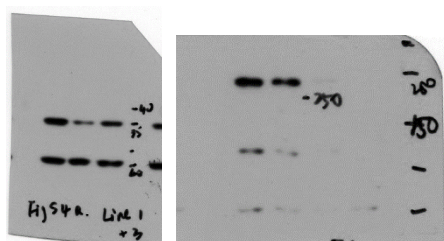

6

7 Supplementary Figure 5b

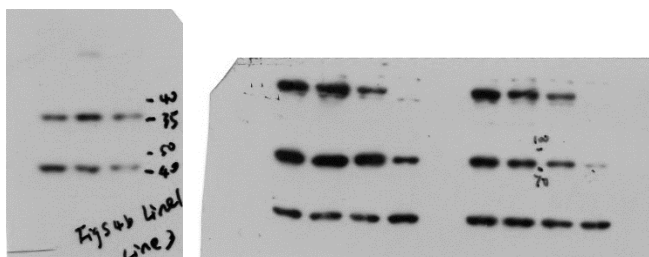

8

9 Supplementary Figure 5c

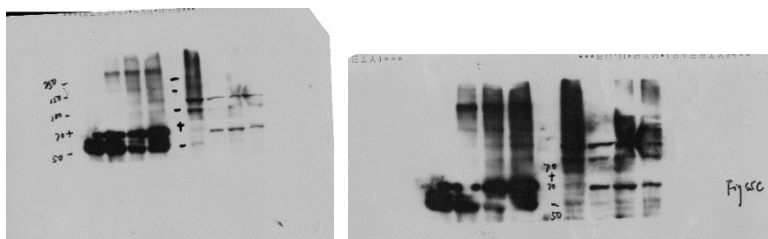

10

11 Supplementary Figure 6b

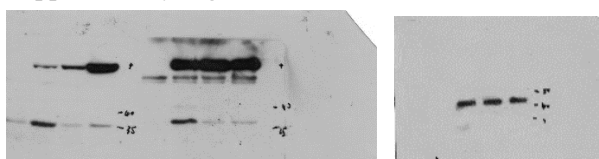

12
